# Supplementary material for: Culturing and Molecular Approaches for Identifying Microbiota Taxa Impacting Children’s Obesogenic Phenotypes Related to Xenobiotic Dietary Exposure
Source: MDPI journal article supplement (doi:10.3390/nu14020241), 2022-01-06
Supplement: s1 [file s1]

## Simplified field tables

| BMI-for-age GIRLS<br>5 to 19 years (z-scores) |        |  World Health Organization |       |       |        |      |      |      |
|-----------------------------------------------|--------|--------------------------------------------------------------------------------------------------------------|-------|-------|--------|------|------|------|
| Year: Month                                   | Months | -3 SD                                                                                                        | -2 SD | -1 SD | Median | 1 SD | 2 SD | 3 SD |
| 5: 1                                          | 61     | 11.8                                                                                                         | 12.7  | 13.9  | 15.2   | 16.9 | 18.9 | 21.3 |
| 5: 2                                          | 62     | 11.8                                                                                                         | 12.7  | 13.9  | 15.2   | 16.9 | 18.9 | 21.4 |
| 5: 3                                          | 63     | 11.8                                                                                                         | 12.7  | 13.9  | 15.2   | 16.9 | 18.9 | 21.5 |
| 5: 4                                          | 64     | 11.8                                                                                                         | 12.7  | 13.9  | 15.2   | 16.9 | 18.9 | 21.5 |
| 5: 5                                          | 65     | 11.7                                                                                                         | 12.7  | 13.9  | 15.2   | 16.9 | 19.0 | 21.6 |
| 5: 6                                          | 66     | 11.7                                                                                                         | 12.7  | 13.9  | 15.2   | 16.9 | 19.0 | 21.7 |
| 5: 7                                          | 67     | 11.7                                                                                                         | 12.7  | 13.9  | 15.2   | 16.9 | 19.0 | 21.7 |
| 5: 8                                          | 68     | 11.7                                                                                                         | 12.7  | 13.9  | 15.3   | 17.0 | 19.1 | 21.8 |
| 5: 9                                          | 69     | 11.7                                                                                                         | 12.7  | 13.9  | 15.3   | 17.0 | 19.1 | 21.9 |
| 5: 10                                         | 70     | 11.7                                                                                                         | 12.7  | 13.9  | 15.3   | 17.0 | 19.1 | 22.0 |
| 5: 11                                         | 71     | 11.7                                                                                                         | 12.7  | 13.9  | 15.3   | 17.0 | 19.2 | 22.1 |
| 6: 0                                          | 72     | 11.7                                                                                                         | 12.7  | 13.9  | 15.3   | 17.0 | 19.2 | 22.1 |
| 6: 1                                          | 73     | 11.7                                                                                                         | 12.7  | 13.9  | 15.3   | 17.0 | 19.3 | 22.2 |
| 6: 2                                          | 74     | 11.7                                                                                                         | 12.7  | 13.9  | 15.3   | 17.0 | 19.3 | 22.3 |
| 6: 3                                          | 75     | 11.7                                                                                                         | 12.7  | 13.9  | 15.3   | 17.1 | 19.3 | 22.4 |
| 6: 4                                          | 76     | 11.7                                                                                                         | 12.7  | 13.9  | 15.3   | 17.1 | 19.4 | 22.5 |
| 6: 5                                          | 77     | 11.7                                                                                                         | 12.7  | 13.9  | 15.3   | 17.1 | 19.4 | 22.6 |
| 6: 6                                          | 78     | 11.7                                                                                                         | 12.7  | 13.9  | 15.3   | 17.1 | 19.5 | 22.7 |
| 6: 7                                          | 79     | 11.7                                                                                                         | 12.7  | 13.9  | 15.3   | 17.2 | 19.5 | 22.8 |
| 6: 8                                          | 80     | 11.7                                                                                                         | 12.7  | 13.9  | 15.3   | 17.2 | 19.6 | 22.9 |
| 6: 9                                          | 81     | 11.7                                                                                                         | 12.7  | 13.9  | 15.4   | 17.2 | 19.6 | 23.0 |
| 6: 10                                         | 82     | 11.7                                                                                                         | 12.7  | 13.9  | 15.4   | 17.2 | 19.7 | 23.1 |
| 6: 11                                         | 83     | 11.7                                                                                                         | 12.7  | 13.9  | 15.4   | 17.3 | 19.7 | 23.2 |
| 7: 0                                          | 84     | 11.8                                                                                                         | 12.7  | 13.9  | 15.4   | 17.3 | 19.8 | 23.3 |
| 7: 1                                          | 85     | 11.8                                                                                                         | 12.7  | 13.9  | 15.4   | 17.3 | 19.8 | 23.4 |
| 7: 2                                          | 86     | 11.8                                                                                                         | 12.8  | 14.0  | 15.4   | 17.4 | 19.9 | 23.5 |
| 7: 3                                          | 87     | 11.8                                                                                                         | 12.8  | 14.0  | 15.5   | 17.4 | 20.0 | 23.6 |
| 7: 4                                          | 88     | 11.8                                                                                                         | 12.8  | 14.0  | 15.5   | 17.4 | 20.0 | 23.7 |
| 7: 5                                          | 89     | 11.8                                                                                                         | 12.8  | 14.0  | 15.5   | 17.5 | 20.1 | 23.9 |
| 7: 6                                          | 90     | 11.8                                                                                                         | 12.8  | 14.0  | 15.5   | 17.5 | 20.1 | 24.0 |

**BMI-for-age GIRLS**  
**5 to 19 years (z-scores)**

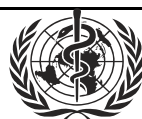

**World Health  
Organization**

| Year: Month | Months | -3 SD | -2 SD | -1 SD | Median | 1 SD | 2 SD | 3 SD |
|-------------|--------|-------|-------|-------|--------|------|------|------|
| 7: 7        | 91     | 11.8  | 12.8  | 14.0  | 15.5   | 17.5 | 20.2 | 24.1 |
| 7: 8        | 92     | 11.8  | 12.8  | 14.0  | 15.6   | 17.6 | 20.3 | 24.2 |
| 7: 9        | 93     | 11.8  | 12.8  | 14.1  | 15.6   | 17.6 | 20.3 | 24.4 |
| 7: 10       | 94     | 11.9  | 12.9  | 14.1  | 15.6   | 17.6 | 20.4 | 24.5 |
| 7: 11       | 95     | 11.9  | 12.9  | 14.1  | 15.7   | 17.7 | 20.5 | 24.6 |
| 8: 0        | 96     | 11.9  | 12.9  | 14.1  | 15.7   | 17.7 | 20.6 | 24.8 |
| 8: 1        | 97     | 11.9  | 12.9  | 14.1  | 15.7   | 17.8 | 20.6 | 24.9 |
| 8: 2        | 98     | 11.9  | 12.9  | 14.2  | 15.7   | 17.8 | 20.7 | 25.1 |
| 8: 3        | 99     | 11.9  | 12.9  | 14.2  | 15.8   | 17.9 | 20.8 | 25.2 |
| 8: 4        | 100    | 11.9  | 13.0  | 14.2  | 15.8   | 17.9 | 20.9 | 25.3 |
| 8: 5        | 101    | 12.0  | 13.0  | 14.2  | 15.8   | 18.0 | 20.9 | 25.5 |
| 8: 6        | 102    | 12.0  | 13.0  | 14.3  | 15.9   | 18.0 | 21.0 | 25.6 |
| 8: 7        | 103    | 12.0  | 13.0  | 14.3  | 15.9   | 18.1 | 21.1 | 25.8 |
| 8: 8        | 104    | 12.0  | 13.0  | 14.3  | 15.9   | 18.1 | 21.2 | 25.9 |
| 8: 9        | 105    | 12.0  | 13.1  | 14.3  | 16.0   | 18.2 | 21.3 | 26.1 |
| 8: 10       | 106    | 12.1  | 13.1  | 14.4  | 16.0   | 18.2 | 21.3 | 26.2 |
| 8: 11       | 107    | 12.1  | 13.1  | 14.4  | 16.1   | 18.3 | 21.4 | 26.4 |
| 9: 0        | 108    | 12.1  | 13.1  | 14.4  | 16.1   | 18.3 | 21.5 | 26.5 |
| 9: 1        | 109    | 12.1  | 13.2  | 14.5  | 16.1   | 18.4 | 21.6 | 26.7 |
| 9: 2        | 110    | 12.1  | 13.2  | 14.5  | 16.2   | 18.4 | 21.7 | 26.8 |
| 9: 3        | 111    | 12.2  | 13.2  | 14.5  | 16.2   | 18.5 | 21.8 | 27.0 |
| 9: 4        | 112    | 12.2  | 13.2  | 14.6  | 16.3   | 18.6 | 21.9 | 27.2 |
| 9: 5        | 113    | 12.2  | 13.3  | 14.6  | 16.3   | 18.6 | 21.9 | 27.3 |
| 9: 6        | 114    | 12.2  | 13.3  | 14.6  | 16.3   | 18.7 | 22.0 | 27.5 |
| 9: 7        | 115    | 12.3  | 13.3  | 14.7  | 16.4   | 18.7 | 22.1 | 27.6 |
| 9: 8        | 116    | 12.3  | 13.4  | 14.7  | 16.4   | 18.8 | 22.2 | 27.8 |
| 9: 9        | 117    | 12.3  | 13.4  | 14.7  | 16.5   | 18.8 | 22.3 | 27.9 |
| 9: 10       | 118    | 12.3  | 13.4  | 14.8  | 16.5   | 18.9 | 22.4 | 28.1 |
| 9: 11       | 119    | 12.4  | 13.4  | 14.8  | 16.6   | 19.0 | 22.5 | 28.2 |
| 10: 0       | 120    | 12.4  | 13.5  | 14.8  | 16.6   | 19.0 | 22.6 | 28.4 |

**BMI-for-age GIRLS**  
5 to 19 years (z-scores)

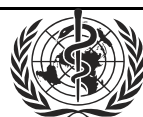

**World Health Organization**

| Year: Month | Months | -3 SD | -2 SD | -1 SD | Median | 1 SD | 2 SD | 3 SD |
|-------------|--------|-------|-------|-------|--------|------|------|------|
| 10: 1       | 121    | 12.4  | 13.5  | 14.9  | 16.7   | 19.1 | 22.7 | 28.5 |
| 10: 2       | 122    | 12.4  | 13.5  | 14.9  | 16.7   | 19.2 | 22.8 | 28.7 |
| 10: 3       | 123    | 12.5  | 13.6  | 15.0  | 16.8   | 19.2 | 22.8 | 28.8 |
| 10: 4       | 124    | 12.5  | 13.6  | 15.0  | 16.8   | 19.3 | 22.9 | 29.0 |
| 10: 5       | 125    | 12.5  | 13.6  | 15.0  | 16.9   | 19.4 | 23.0 | 29.1 |
| 10: 6       | 126    | 12.5  | 13.7  | 15.1  | 16.9   | 19.4 | 23.1 | 29.3 |
| 10: 7       | 127    | 12.6  | 13.7  | 15.1  | 17.0   | 19.5 | 23.2 | 29.4 |
| 10: 8       | 128    | 12.6  | 13.7  | 15.2  | 17.0   | 19.6 | 23.3 | 29.6 |
| 10: 9       | 129    | 12.6  | 13.8  | 15.2  | 17.1   | 19.6 | 23.4 | 29.7 |
| 10: 10      | 130    | 12.7  | 13.8  | 15.3  | 17.1   | 19.7 | 23.5 | 29.9 |
| 10: 11      | 131    | 12.7  | 13.8  | 15.3  | 17.2   | 19.8 | 23.6 | 30.0 |
| 11: 0       | 132    | 12.7  | 13.9  | 15.3  | 17.2   | 19.9 | 23.7 | 30.2 |
| 11: 1       | 133    | 12.8  | 13.9  | 15.4  | 17.3   | 19.9 | 23.8 | 30.3 |
| 11: 2       | 134    | 12.8  | 14.0  | 15.4  | 17.4   | 20.0 | 23.9 | 30.5 |
| 11: 3       | 135    | 12.8  | 14.0  | 15.5  | 17.4   | 20.1 | 24.0 | 30.6 |
| 11: 4       | 136    | 12.9  | 14.0  | 15.5  | 17.5   | 20.2 | 24.1 | 30.8 |
| 11: 5       | 137    | 12.9  | 14.1  | 15.6  | 17.5   | 20.2 | 24.2 | 30.9 |
| 11: 6       | 138    | 12.9  | 14.1  | 15.6  | 17.6   | 20.3 | 24.3 | 31.1 |
| 11: 7       | 139    | 13.0  | 14.2  | 15.7  | 17.7   | 20.4 | 24.4 | 31.2 |
| 11: 8       | 140    | 13.0  | 14.2  | 15.7  | 17.7   | 20.5 | 24.5 | 31.4 |
| 11: 9       | 141    | 13.0  | 14.3  | 15.8  | 17.8   | 20.6 | 24.7 | 31.5 |
| 11: 10      | 142    | 13.1  | 14.3  | 15.8  | 17.9   | 20.6 | 24.8 | 31.6 |
| 11: 11      | 143    | 13.1  | 14.3  | 15.9  | 17.9   | 20.7 | 24.9 | 31.8 |
| 12: 0       | 144    | 13.2  | 14.4  | 16.0  | 18.0   | 20.8 | 25.0 | 31.9 |
| 12: 1       | 145    | 13.2  | 14.4  | 16.0  | 18.1   | 20.9 | 25.1 | 32.0 |
| 12: 2       | 146    | 13.2  | 14.5  | 16.1  | 18.1   | 21.0 | 25.2 | 32.2 |
| 12: 3       | 147    | 13.3  | 14.5  | 16.1  | 18.2   | 21.1 | 25.3 | 32.3 |
| 12: 4       | 148    | 13.3  | 14.6  | 16.2  | 18.3   | 21.1 | 25.4 | 32.4 |
| 12: 5       | 149    | 13.3  | 14.6  | 16.2  | 18.3   | 21.2 | 25.5 | 32.6 |
| 12: 6       | 150    | 13.4  | 14.7  | 16.3  | 18.4   | 21.3 | 25.6 | 32.7 |

**BMI-for-age GIRLS**  
**5 to 19 years (z-scores)**



**World Health  
 Organization**

| Year: Month | Months | -3 SD | -2 SD | -1 SD | Median | 1 SD | 2 SD | 3 SD |
|-------------|--------|-------|-------|-------|--------|------|------|------|
| 12: 7       | 151    | 13.4  | 14.7  | 16.3  | 18.5   | 21.4 | 25.7 | 32.8 |
| 12: 8       | 152    | 13.5  | 14.8  | 16.4  | 18.5   | 21.5 | 25.8 | 33.0 |
| 12: 9       | 153    | 13.5  | 14.8  | 16.4  | 18.6   | 21.6 | 25.9 | 33.1 |
| 12: 10      | 154    | 13.5  | 14.8  | 16.5  | 18.7   | 21.6 | 26.0 | 33.2 |
| 12: 11      | 155    | 13.6  | 14.9  | 16.6  | 18.7   | 21.7 | 26.1 | 33.3 |
| 13: 0       | 156    | 13.6  | 14.9  | 16.6  | 18.8   | 21.8 | 26.2 | 33.4 |
| 13: 1       | 157    | 13.6  | 15.0  | 16.7  | 18.9   | 21.9 | 26.3 | 33.6 |
| 13: 2       | 158    | 13.7  | 15.0  | 16.7  | 18.9   | 22.0 | 26.4 | 33.7 |
| 13: 3       | 159    | 13.7  | 15.1  | 16.8  | 19.0   | 22.0 | 26.5 | 33.8 |
| 13: 4       | 160    | 13.8  | 15.1  | 16.8  | 19.1   | 22.1 | 26.6 | 33.9 |
| 13: 5       | 161    | 13.8  | 15.2  | 16.9  | 19.1   | 22.2 | 26.7 | 34.0 |
| 13: 6       | 162    | 13.8  | 15.2  | 16.9  | 19.2   | 22.3 | 26.8 | 34.1 |
| 13: 7       | 163    | 13.9  | 15.2  | 17.0  | 19.3   | 22.4 | 26.9 | 34.2 |
| 13: 8       | 164    | 13.9  | 15.3  | 17.0  | 19.3   | 22.4 | 27.0 | 34.3 |
| 13: 9       | 165    | 13.9  | 15.3  | 17.1  | 19.4   | 22.5 | 27.1 | 34.4 |
| 13: 10      | 166    | 14.0  | 15.4  | 17.1  | 19.4   | 22.6 | 27.1 | 34.5 |
| 13: 11      | 167    | 14.0  | 15.4  | 17.2  | 19.5   | 22.7 | 27.2 | 34.6 |
| 14: 0       | 168    | 14.0  | 15.4  | 17.2  | 19.6   | 22.7 | 27.3 | 34.7 |
| 14: 1       | 169    | 14.1  | 15.5  | 17.3  | 19.6   | 22.8 | 27.4 | 34.7 |
| 14: 2       | 170    | 14.1  | 15.5  | 17.3  | 19.7   | 22.9 | 27.5 | 34.8 |
| 14: 3       | 171    | 14.1  | 15.6  | 17.4  | 19.7   | 22.9 | 27.6 | 34.9 |
| 14: 4       | 172    | 14.1  | 15.6  | 17.4  | 19.8   | 23.0 | 27.7 | 35.0 |
| 14: 5       | 173    | 14.2  | 15.6  | 17.5  | 19.9   | 23.1 | 27.7 | 35.1 |
| 14: 6       | 174    | 14.2  | 15.7  | 17.5  | 19.9   | 23.1 | 27.8 | 35.1 |
| 14: 7       | 175    | 14.2  | 15.7  | 17.6  | 20.0   | 23.2 | 27.9 | 35.2 |
| 14: 8       | 176    | 14.3  | 15.7  | 17.6  | 20.0   | 23.3 | 28.0 | 35.3 |
| 14: 9       | 177    | 14.3  | 15.8  | 17.6  | 20.1   | 23.3 | 28.0 | 35.4 |
| 14: 10      | 178    | 14.3  | 15.8  | 17.7  | 20.1   | 23.4 | 28.1 | 35.4 |
| 14: 11      | 179    | 14.3  | 15.8  | 17.7  | 20.2   | 23.5 | 28.2 | 35.5 |
| 15: 0       | 180    | 14.4  | 15.9  | 17.8  | 20.2   | 23.5 | 28.2 | 35.5 |

**BMI-for-age GIRLS**  
**5 to 19 years (z-scores)**



**World Health  
Organization**

| Year: Month | Months | -3 SD | -2 SD | -1 SD | Median | 1 SD | 2 SD | 3 SD |
|-------------|--------|-------|-------|-------|--------|------|------|------|
| 15: 1       | 181    | 14.4  | 15.9  | 17.8  | 20.3   | 23.6 | 28.3 | 35.6 |
| 15: 2       | 182    | 14.4  | 15.9  | 17.8  | 20.3   | 23.6 | 28.4 | 35.7 |
| 15: 3       | 183    | 14.4  | 16.0  | 17.9  | 20.4   | 23.7 | 28.4 | 35.7 |
| 15: 4       | 184    | 14.5  | 16.0  | 17.9  | 20.4   | 23.7 | 28.5 | 35.8 |
| 15: 5       | 185    | 14.5  | 16.0  | 17.9  | 20.4   | 23.8 | 28.5 | 35.8 |
| 15: 6       | 186    | 14.5  | 16.0  | 18.0  | 20.5   | 23.8 | 28.6 | 35.8 |
| 15: 7       | 187    | 14.5  | 16.1  | 18.0  | 20.5   | 23.9 | 28.6 | 35.9 |
| 15: 8       | 188    | 14.5  | 16.1  | 18.0  | 20.6   | 23.9 | 28.7 | 35.9 |
| 15: 9       | 189    | 14.5  | 16.1  | 18.1  | 20.6   | 24.0 | 28.7 | 36.0 |
| 15: 10      | 190    | 14.6  | 16.1  | 18.1  | 20.6   | 24.0 | 28.8 | 36.0 |
| 15: 11      | 191    | 14.6  | 16.2  | 18.1  | 20.7   | 24.1 | 28.8 | 36.0 |
| 16: 0       | 192    | 14.6  | 16.2  | 18.2  | 20.7   | 24.1 | 28.9 | 36.1 |
| 16: 1       | 193    | 14.6  | 16.2  | 18.2  | 20.7   | 24.1 | 28.9 | 36.1 |
| 16: 2       | 194    | 14.6  | 16.2  | 18.2  | 20.8   | 24.2 | 29.0 | 36.1 |
| 16: 3       | 195    | 14.6  | 16.2  | 18.2  | 20.8   | 24.2 | 29.0 | 36.1 |
| 16: 4       | 196    | 14.6  | 16.2  | 18.3  | 20.8   | 24.3 | 29.0 | 36.2 |
| 16: 5       | 197    | 14.6  | 16.3  | 18.3  | 20.9   | 24.3 | 29.1 | 36.2 |
| 16: 6       | 198    | 14.7  | 16.3  | 18.3  | 20.9   | 24.3 | 29.1 | 36.2 |
| 16: 7       | 199    | 14.7  | 16.3  | 18.3  | 20.9   | 24.4 | 29.1 | 36.2 |
| 16: 8       | 200    | 14.7  | 16.3  | 18.3  | 20.9   | 24.4 | 29.2 | 36.2 |
| 16: 9       | 201    | 14.7  | 16.3  | 18.4  | 21.0   | 24.4 | 29.2 | 36.3 |
| 16: 10      | 202    | 14.7  | 16.3  | 18.4  | 21.0   | 24.4 | 29.2 | 36.3 |
| 16: 11      | 203    | 14.7  | 16.3  | 18.4  | 21.0   | 24.5 | 29.3 | 36.3 |
| 17: 0       | 204    | 14.7  | 16.4  | 18.4  | 21.0   | 24.5 | 29.3 | 36.3 |
| 17: 1       | 205    | 14.7  | 16.4  | 18.4  | 21.1   | 24.5 | 29.3 | 36.3 |
| 17: 2       | 206    | 14.7  | 16.4  | 18.4  | 21.1   | 24.6 | 29.3 | 36.3 |
| 17: 3       | 207    | 14.7  | 16.4  | 18.5  | 21.1   | 24.6 | 29.4 | 36.3 |
| 17: 4       | 208    | 14.7  | 16.4  | 18.5  | 21.1   | 24.6 | 29.4 | 36.3 |
| 17: 5       | 209    | 14.7  | 16.4  | 18.5  | 21.1   | 24.6 | 29.4 | 36.3 |
| 17: 6       | 210    | 14.7  | 16.4  | 18.5  | 21.2   | 24.6 | 29.4 | 36.3 |

**BMI-for-age GIRLS**  
**5 to 19 years (z-scores)**

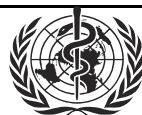

**World Health  
Organization**

| Year: Month | Months | -3 SD | -2 SD | -1 SD | Median | 1 SD | 2 SD | 3 SD |
|-------------|--------|-------|-------|-------|--------|------|------|------|
| 17: 7       | 211    | 14.7  | 16.4  | 18.5  | 21.2   | 24.7 | 29.4 | 36.3 |
| 17: 8       | 212    | 14.7  | 16.4  | 18.5  | 21.2   | 24.7 | 29.5 | 36.3 |
| 17: 9       | 213    | 14.7  | 16.4  | 18.5  | 21.2   | 24.7 | 29.5 | 36.3 |
| 17: 10      | 214    | 14.7  | 16.4  | 18.5  | 21.2   | 24.7 | 29.5 | 36.3 |
| 17: 11      | 215    | 14.7  | 16.4  | 18.6  | 21.2   | 24.8 | 29.5 | 36.3 |
| 18: 0       | 216    | 14.7  | 16.4  | 18.6  | 21.3   | 24.8 | 29.5 | 36.3 |
| 18: 1       | 217    | 14.7  | 16.5  | 18.6  | 21.3   | 24.8 | 29.5 | 36.3 |
| 18: 2       | 218    | 14.7  | 16.5  | 18.6  | 21.3   | 24.8 | 29.6 | 36.3 |
| 18: 3       | 219    | 14.7  | 16.5  | 18.6  | 21.3   | 24.8 | 29.6 | 36.3 |
| 18: 4       | 220    | 14.7  | 16.5  | 18.6  | 21.3   | 24.8 | 29.6 | 36.3 |
| 18: 5       | 221    | 14.7  | 16.5  | 18.6  | 21.3   | 24.9 | 29.6 | 36.2 |
| 18: 6       | 222    | 14.7  | 16.5  | 18.6  | 21.3   | 24.9 | 29.6 | 36.2 |
| 18: 7       | 223    | 14.7  | 16.5  | 18.6  | 21.4   | 24.9 | 29.6 | 36.2 |
| 18: 8       | 224    | 14.7  | 16.5  | 18.6  | 21.4   | 24.9 | 29.6 | 36.2 |
| 18: 9       | 225    | 14.7  | 16.5  | 18.7  | 21.4   | 24.9 | 29.6 | 36.2 |
| 18: 10      | 226    | 14.7  | 16.5  | 18.7  | 21.4   | 24.9 | 29.6 | 36.2 |
| 18: 11      | 227    | 14.7  | 16.5  | 18.7  | 21.4   | 25.0 | 29.7 | 36.2 |
| 19: 0       | 228    | 14.7  | 16.5  | 18.7  | 21.4   | 25.0 | 29.7 | 36.2 |

**2007 WHO Reference**

## Simplified field tables

| BMI-for-age BOYS<br>5 to 19 years (z-scores) |        |  World Health Organization |       |       |        |      |      |      |
|----------------------------------------------|--------|--------------------------------------------------------------------------------------------------------------|-------|-------|--------|------|------|------|
| Year: Month                                  | Months | -3 SD                                                                                                        | -2 SD | -1 SD | Median | 1 SD | 2 SD | 3 SD |
| 5: 1                                         | 61     | 12.1                                                                                                         | 13.0  | 14.1  | 15.3   | 16.6 | 18.3 | 20.2 |
| 5: 2                                         | 62     | 12.1                                                                                                         | 13.0  | 14.1  | 15.3   | 16.6 | 18.3 | 20.2 |
| 5: 3                                         | 63     | 12.1                                                                                                         | 13.0  | 14.1  | 15.3   | 16.7 | 18.3 | 20.2 |
| 5: 4                                         | 64     | 12.1                                                                                                         | 13.0  | 14.1  | 15.3   | 16.7 | 18.3 | 20.3 |
| 5: 5                                         | 65     | 12.1                                                                                                         | 13.0  | 14.1  | 15.3   | 16.7 | 18.3 | 20.3 |
| 5: 6                                         | 66     | 12.1                                                                                                         | 13.0  | 14.1  | 15.3   | 16.7 | 18.4 | 20.4 |
| 5: 7                                         | 67     | 12.1                                                                                                         | 13.0  | 14.1  | 15.3   | 16.7 | 18.4 | 20.4 |
| 5: 8                                         | 68     | 12.1                                                                                                         | 13.0  | 14.1  | 15.3   | 16.7 | 18.4 | 20.5 |
| 5: 9                                         | 69     | 12.1                                                                                                         | 13.0  | 14.1  | 15.3   | 16.7 | 18.4 | 20.5 |
| 5: 10                                        | 70     | 12.1                                                                                                         | 13.0  | 14.1  | 15.3   | 16.7 | 18.5 | 20.6 |
| 5: 11                                        | 71     | 12.1                                                                                                         | 13.0  | 14.1  | 15.3   | 16.7 | 18.5 | 20.6 |
| 6: 0                                         | 72     | 12.1                                                                                                         | 13.0  | 14.1  | 15.3   | 16.8 | 18.5 | 20.7 |
| 6: 1                                         | 73     | 12.1                                                                                                         | 13.0  | 14.1  | 15.3   | 16.8 | 18.6 | 20.8 |
| 6: 2                                         | 74     | 12.2                                                                                                         | 13.1  | 14.1  | 15.3   | 16.8 | 18.6 | 20.8 |
| 6: 3                                         | 75     | 12.2                                                                                                         | 13.1  | 14.1  | 15.3   | 16.8 | 18.6 | 20.9 |
| 6: 4                                         | 76     | 12.2                                                                                                         | 13.1  | 14.1  | 15.4   | 16.8 | 18.7 | 21.0 |
| 6: 5                                         | 77     | 12.2                                                                                                         | 13.1  | 14.1  | 15.4   | 16.9 | 18.7 | 21.0 |
| 6: 6                                         | 78     | 12.2                                                                                                         | 13.1  | 14.1  | 15.4   | 16.9 | 18.7 | 21.1 |
| 6: 7                                         | 79     | 12.2                                                                                                         | 13.1  | 14.1  | 15.4   | 16.9 | 18.8 | 21.2 |
| 6: 8                                         | 80     | 12.2                                                                                                         | 13.1  | 14.2  | 15.4   | 16.9 | 18.8 | 21.3 |
| 6: 9                                         | 81     | 12.2                                                                                                         | 13.1  | 14.2  | 15.4   | 17.0 | 18.9 | 21.3 |
| 6: 10                                        | 82     | 12.2                                                                                                         | 13.1  | 14.2  | 15.4   | 17.0 | 18.9 | 21.4 |
| 6: 11                                        | 83     | 12.2                                                                                                         | 13.1  | 14.2  | 15.5   | 17.0 | 19.0 | 21.5 |
| 7: 0                                         | 84     | 12.3                                                                                                         | 13.1  | 14.2  | 15.5   | 17.0 | 19.0 | 21.6 |
| 7: 1                                         | 85     | 12.3                                                                                                         | 13.2  | 14.2  | 15.5   | 17.1 | 19.1 | 21.7 |
| 7: 2                                         | 86     | 12.3                                                                                                         | 13.2  | 14.2  | 15.5   | 17.1 | 19.1 | 21.8 |
| 7: 3                                         | 87     | 12.3                                                                                                         | 13.2  | 14.3  | 15.5   | 17.1 | 19.2 | 21.9 |
| 7: 4                                         | 88     | 12.3                                                                                                         | 13.2  | 14.3  | 15.6   | 17.2 | 19.2 | 22.0 |
| 7: 5                                         | 89     | 12.3                                                                                                         | 13.2  | 14.3  | 15.6   | 17.2 | 19.3 | 22.0 |
| 7: 6                                         | 90     | 12.3                                                                                                         | 13.2  | 14.3  | 15.6   | 17.2 | 19.3 | 22.1 |

**BMI-for-age BOYS**  
5 to 19 years (z-scores)

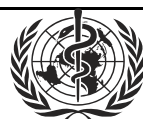

**World Health Organization**

| Year: Month | Months | -3 SD | -2 SD | -1 SD | Median | 1 SD | 2 SD | 3 SD |
|-------------|--------|-------|-------|-------|--------|------|------|------|
| 7: 7        | 91     | 12.3  | 13.2  | 14.3  | 15.6   | 17.3 | 19.4 | 22.2 |
| 7: 8        | 92     | 12.3  | 13.2  | 14.3  | 15.6   | 17.3 | 19.4 | 22.4 |
| 7: 9        | 93     | 12.4  | 13.3  | 14.3  | 15.7   | 17.3 | 19.5 | 22.5 |
| 7: 10       | 94     | 12.4  | 13.3  | 14.4  | 15.7   | 17.4 | 19.6 | 22.6 |
| 7: 11       | 95     | 12.4  | 13.3  | 14.4  | 15.7   | 17.4 | 19.6 | 22.7 |
| 8: 0        | 96     | 12.4  | 13.3  | 14.4  | 15.7   | 17.4 | 19.7 | 22.8 |
| 8: 1        | 97     | 12.4  | 13.3  | 14.4  | 15.8   | 17.5 | 19.7 | 22.9 |
| 8: 2        | 98     | 12.4  | 13.3  | 14.4  | 15.8   | 17.5 | 19.8 | 23.0 |
| 8: 3        | 99     | 12.4  | 13.3  | 14.4  | 15.8   | 17.5 | 19.9 | 23.1 |
| 8: 4        | 100    | 12.4  | 13.4  | 14.5  | 15.8   | 17.6 | 19.9 | 23.3 |
| 8: 5        | 101    | 12.5  | 13.4  | 14.5  | 15.9   | 17.6 | 20.0 | 23.4 |
| 8: 6        | 102    | 12.5  | 13.4  | 14.5  | 15.9   | 17.7 | 20.1 | 23.5 |
| 8: 7        | 103    | 12.5  | 13.4  | 14.5  | 15.9   | 17.7 | 20.1 | 23.6 |
| 8: 8        | 104    | 12.5  | 13.4  | 14.5  | 15.9   | 17.7 | 20.2 | 23.8 |
| 8: 9        | 105    | 12.5  | 13.4  | 14.6  | 16.0   | 17.8 | 20.3 | 23.9 |
| 8: 10       | 106    | 12.5  | 13.5  | 14.6  | 16.0   | 17.8 | 20.3 | 24.0 |
| 8: 11       | 107    | 12.5  | 13.5  | 14.6  | 16.0   | 17.9 | 20.4 | 24.2 |
| 9: 0        | 108    | 12.6  | 13.5  | 14.6  | 16.0   | 17.9 | 20.5 | 24.3 |
| 9: 1        | 109    | 12.6  | 13.5  | 14.6  | 16.1   | 18.0 | 20.5 | 24.4 |
| 9: 2        | 110    | 12.6  | 13.5  | 14.7  | 16.1   | 18.0 | 20.6 | 24.6 |
| 9: 3        | 111    | 12.6  | 13.5  | 14.7  | 16.1   | 18.0 | 20.7 | 24.7 |
| 9: 4        | 112    | 12.6  | 13.6  | 14.7  | 16.2   | 18.1 | 20.8 | 24.9 |
| 9: 5        | 113    | 12.6  | 13.6  | 14.7  | 16.2   | 18.1 | 20.8 | 25.0 |
| 9: 6        | 114    | 12.7  | 13.6  | 14.8  | 16.2   | 18.2 | 20.9 | 25.1 |
| 9: 7        | 115    | 12.7  | 13.6  | 14.8  | 16.3   | 18.2 | 21.0 | 25.3 |
| 9: 8        | 116    | 12.7  | 13.6  | 14.8  | 16.3   | 18.3 | 21.1 | 25.5 |
| 9: 9        | 117    | 12.7  | 13.7  | 14.8  | 16.3   | 18.3 | 21.2 | 25.6 |
| 9: 10       | 118    | 12.7  | 13.7  | 14.9  | 16.4   | 18.4 | 21.2 | 25.8 |
| 9: 11       | 119    | 12.8  | 13.7  | 14.9  | 16.4   | 18.4 | 21.3 | 25.9 |
| 10: 0       | 120    | 12.8  | 13.7  | 14.9  | 16.4   | 18.5 | 21.4 | 26.1 |



**BMI-for-age BOYS**  
**5 to 19 years (z-scores)**

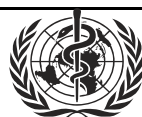

**World Health  
 Organization**

| Year: Month | Months | -3 SD | -2 SD | -1 SD | Median | 1 SD | 2 SD | 3 SD |
|-------------|--------|-------|-------|-------|--------|------|------|------|
| 10: 1       | 121    | 12.8  | 13.8  | 15.0  | 16.5   | 18.5 | 21.5 | 26.2 |
| 10: 2       | 122    | 12.8  | 13.8  | 15.0  | 16.5   | 18.6 | 21.6 | 26.4 |
| 10: 3       | 123    | 12.8  | 13.8  | 15.0  | 16.6   | 18.6 | 21.7 | 26.6 |
| 10: 4       | 124    | 12.9  | 13.8  | 15.0  | 16.6   | 18.7 | 21.7 | 26.7 |
| 10: 5       | 125    | 12.9  | 13.9  | 15.1  | 16.6   | 18.8 | 21.8 | 26.9 |
| 10: 6       | 126    | 12.9  | 13.9  | 15.1  | 16.7   | 18.8 | 21.9 | 27.0 |
| 10: 7       | 127    | 12.9  | 13.9  | 15.1  | 16.7   | 18.9 | 22.0 | 27.2 |
| 10: 8       | 128    | 13.0  | 13.9  | 15.2  | 16.8   | 18.9 | 22.1 | 27.4 |
| 10: 9       | 129    | 13.0  | 14.0  | 15.2  | 16.8   | 19.0 | 22.2 | 27.5 |
| 10: 10      | 130    | 13.0  | 14.0  | 15.2  | 16.9   | 19.0 | 22.3 | 27.7 |
| 10: 11      | 131    | 13.0  | 14.0  | 15.3  | 16.9   | 19.1 | 22.4 | 27.9 |
| 11: 0       | 132    | 13.1  | 14.1  | 15.3  | 16.9   | 19.2 | 22.5 | 28.0 |
| 11: 1       | 133    | 13.1  | 14.1  | 15.3  | 17.0   | 19.2 | 22.5 | 28.2 |
| 11: 2       | 134    | 13.1  | 14.1  | 15.4  | 17.0   | 19.3 | 22.6 | 28.4 |
| 11: 3       | 135    | 13.1  | 14.1  | 15.4  | 17.1   | 19.3 | 22.7 | 28.5 |
| 11: 4       | 136    | 13.2  | 14.2  | 15.5  | 17.1   | 19.4 | 22.8 | 28.7 |
| 11: 5       | 137    | 13.2  | 14.2  | 15.5  | 17.2   | 19.5 | 22.9 | 28.8 |
| 11: 6       | 138    | 13.2  | 14.2  | 15.5  | 17.2   | 19.5 | 23.0 | 29.0 |
| 11: 7       | 139    | 13.2  | 14.3  | 15.6  | 17.3   | 19.6 | 23.1 | 29.2 |
| 11: 8       | 140    | 13.3  | 14.3  | 15.6  | 17.3   | 19.7 | 23.2 | 29.3 |
| 11: 9       | 141    | 13.3  | 14.3  | 15.7  | 17.4   | 19.7 | 23.3 | 29.5 |
| 11: 10      | 142    | 13.3  | 14.4  | 15.7  | 17.4   | 19.8 | 23.4 | 29.6 |
| 11: 11      | 143    | 13.4  | 14.4  | 15.7  | 17.5   | 19.9 | 23.5 | 29.8 |
| 12: 0       | 144    | 13.4  | 14.5  | 15.8  | 17.5   | 19.9 | 23.6 | 30.0 |
| 12: 1       | 145    | 13.4  | 14.5  | 15.8  | 17.6   | 20.0 | 23.7 | 30.1 |
| 12: 2       | 146    | 13.5  | 14.5  | 15.9  | 17.6   | 20.1 | 23.8 | 30.3 |
| 12: 3       | 147    | 13.5  | 14.6  | 15.9  | 17.7   | 20.2 | 23.9 | 30.4 |
| 12: 4       | 148    | 13.5  | 14.6  | 16.0  | 17.8   | 20.2 | 24.0 | 30.6 |
| 12: 5       | 149    | 13.6  | 14.6  | 16.0  | 17.8   | 20.3 | 24.1 | 30.7 |
| 12: 6       | 150    | 13.6  | 14.7  | 16.1  | 17.9   | 20.4 | 24.2 | 30.9 |

**BMI-for-age BOYS**  
**5 to 19 years (z-scores)**



**World Health  
 Organization**

| Year: Month | Months | -3 SD | -2 SD | -1 SD | Median | 1 SD | 2 SD | 3 SD |
|-------------|--------|-------|-------|-------|--------|------|------|------|
| 12: 7       | 151    | 13.6  | 14.7  | 16.1  | 17.9   | 20.4 | 24.3 | 31.0 |
| 12: 8       | 152    | 13.7  | 14.8  | 16.2  | 18.0   | 20.5 | 24.4 | 31.1 |
| 12: 9       | 153    | 13.7  | 14.8  | 16.2  | 18.0   | 20.6 | 24.5 | 31.3 |
| 12: 10      | 154    | 13.7  | 14.8  | 16.3  | 18.1   | 20.7 | 24.6 | 31.4 |
| 12: 11      | 155    | 13.8  | 14.9  | 16.3  | 18.2   | 20.8 | 24.7 | 31.6 |
| 13: 0       | 156    | 13.8  | 14.9  | 16.4  | 18.2   | 20.8 | 24.8 | 31.7 |
| 13: 1       | 157    | 13.8  | 15.0  | 16.4  | 18.3   | 20.9 | 24.9 | 31.8 |
| 13: 2       | 158    | 13.9  | 15.0  | 16.5  | 18.4   | 21.0 | 25.0 | 31.9 |
| 13: 3       | 159    | 13.9  | 15.1  | 16.5  | 18.4   | 21.1 | 25.1 | 32.1 |
| 13: 4       | 160    | 14.0  | 15.1  | 16.6  | 18.5   | 21.1 | 25.2 | 32.2 |
| 13: 5       | 161    | 14.0  | 15.2  | 16.6  | 18.6   | 21.2 | 25.2 | 32.3 |
| 13: 6       | 162    | 14.0  | 15.2  | 16.7  | 18.6   | 21.3 | 25.3 | 32.4 |
| 13: 7       | 163    | 14.1  | 15.2  | 16.7  | 18.7   | 21.4 | 25.4 | 32.6 |
| 13: 8       | 164    | 14.1  | 15.3  | 16.8  | 18.7   | 21.5 | 25.5 | 32.7 |
| 13: 9       | 165    | 14.1  | 15.3  | 16.8  | 18.8   | 21.5 | 25.6 | 32.8 |
| 13: 10      | 166    | 14.2  | 15.4  | 16.9  | 18.9   | 21.6 | 25.7 | 32.9 |
| 13: 11      | 167    | 14.2  | 15.4  | 17.0  | 18.9   | 21.7 | 25.8 | 33.0 |
| 14: 0       | 168    | 14.3  | 15.5  | 17.0  | 19.0   | 21.8 | 25.9 | 33.1 |
| 14: 1       | 169    | 14.3  | 15.5  | 17.1  | 19.1   | 21.8 | 26.0 | 33.2 |
| 14: 2       | 170    | 14.3  | 15.6  | 17.1  | 19.1   | 21.9 | 26.1 | 33.3 |
| 14: 3       | 171    | 14.4  | 15.6  | 17.2  | 19.2   | 22.0 | 26.2 | 33.4 |
| 14: 4       | 172    | 14.4  | 15.7  | 17.2  | 19.3   | 22.1 | 26.3 | 33.5 |
| 14: 5       | 173    | 14.5  | 15.7  | 17.3  | 19.3   | 22.2 | 26.4 | 33.5 |
| 14: 6       | 174    | 14.5  | 15.7  | 17.3  | 19.4   | 22.2 | 26.5 | 33.6 |
| 14: 7       | 175    | 14.5  | 15.8  | 17.4  | 19.5   | 22.3 | 26.5 | 33.7 |
| 14: 8       | 176    | 14.6  | 15.8  | 17.4  | 19.5   | 22.4 | 26.6 | 33.8 |
| 14: 9       | 177    | 14.6  | 15.9  | 17.5  | 19.6   | 22.5 | 26.7 | 33.9 |
| 14: 10      | 178    | 14.6  | 15.9  | 17.5  | 19.6   | 22.5 | 26.8 | 33.9 |
| 14: 11      | 179    | 14.7  | 16.0  | 17.6  | 19.7   | 22.6 | 26.9 | 34.0 |
| 15: 0       | 180    | 14.7  | 16.0  | 17.6  | 19.8   | 22.7 | 27.0 | 34.1 |

**BMI-for-age BOYS**  
**5 to 19 years (z-scores)**



**World Health  
Organization**

| Year: Month | Months | -3 SD | -2 SD | -1 SD | Median | 1 SD | 2 SD | 3 SD |
|-------------|--------|-------|-------|-------|--------|------|------|------|
| 15: 1       | 181    | 14.7  | 16.1  | 17.7  | 19.8   | 22.8 | 27.1 | 34.1 |
| 15: 2       | 182    | 14.8  | 16.1  | 17.8  | 19.9   | 22.8 | 27.1 | 34.2 |
| 15: 3       | 183    | 14.8  | 16.1  | 17.8  | 20.0   | 22.9 | 27.2 | 34.3 |
| 15: 4       | 184    | 14.8  | 16.2  | 17.9  | 20.0   | 23.0 | 27.3 | 34.3 |
| 15: 5       | 185    | 14.9  | 16.2  | 17.9  | 20.1   | 23.0 | 27.4 | 34.4 |
| 15: 6       | 186    | 14.9  | 16.3  | 18.0  | 20.1   | 23.1 | 27.4 | 34.5 |
| 15: 7       | 187    | 15.0  | 16.3  | 18.0  | 20.2   | 23.2 | 27.5 | 34.5 |
| 15: 8       | 188    | 15.0  | 16.3  | 18.1  | 20.3   | 23.3 | 27.6 | 34.6 |
| 15: 9       | 189    | 15.0  | 16.4  | 18.1  | 20.3   | 23.3 | 27.7 | 34.6 |
| 15: 10      | 190    | 15.0  | 16.4  | 18.2  | 20.4   | 23.4 | 27.7 | 34.7 |
| 15: 11      | 191    | 15.1  | 16.5  | 18.2  | 20.4   | 23.5 | 27.8 | 34.7 |
| 16: 0       | 192    | 15.1  | 16.5  | 18.2  | 20.5   | 23.5 | 27.9 | 34.8 |
| 16: 1       | 193    | 15.1  | 16.5  | 18.3  | 20.6   | 23.6 | 27.9 | 34.8 |
| 16: 2       | 194    | 15.2  | 16.6  | 18.3  | 20.6   | 23.7 | 28.0 | 34.8 |
| 16: 3       | 195    | 15.2  | 16.6  | 18.4  | 20.7   | 23.7 | 28.1 | 34.9 |
| 16: 4       | 196    | 15.2  | 16.7  | 18.4  | 20.7   | 23.8 | 28.1 | 34.9 |
| 16: 5       | 197    | 15.3  | 16.7  | 18.5  | 20.8   | 23.8 | 28.2 | 35.0 |
| 16: 6       | 198    | 15.3  | 16.7  | 18.5  | 20.8   | 23.9 | 28.3 | 35.0 |
| 16: 7       | 199    | 15.3  | 16.8  | 18.6  | 20.9   | 24.0 | 28.3 | 35.0 |
| 16: 8       | 200    | 15.3  | 16.8  | 18.6  | 20.9   | 24.0 | 28.4 | 35.1 |
| 16: 9       | 201    | 15.4  | 16.8  | 18.7  | 21.0   | 24.1 | 28.5 | 35.1 |
| 16: 10      | 202    | 15.4  | 16.9  | 18.7  | 21.0   | 24.2 | 28.5 | 35.1 |
| 16: 11      | 203    | 15.4  | 16.9  | 18.7  | 21.1   | 24.2 | 28.6 | 35.2 |
| 17: 0       | 204    | 15.4  | 16.9  | 18.8  | 21.1   | 24.3 | 28.6 | 35.2 |
| 17: 1       | 205    | 15.5  | 17.0  | 18.8  | 21.2   | 24.3 | 28.7 | 35.2 |
| 17: 2       | 206    | 15.5  | 17.0  | 18.9  | 21.2   | 24.4 | 28.7 | 35.2 |
| 17: 3       | 207    | 15.5  | 17.0  | 18.9  | 21.3   | 24.4 | 28.8 | 35.3 |
| 17: 4       | 208    | 15.5  | 17.1  | 18.9  | 21.3   | 24.5 | 28.9 | 35.3 |
| 17: 5       | 209    | 15.6  | 17.1  | 19.0  | 21.4   | 24.5 | 28.9 | 35.3 |
| 17: 6       | 210    | 15.6  | 17.1  | 19.0  | 21.4   | 24.6 | 29.0 | 35.3 |

**BMI-for-age BOYS**  
**5 to 19 years (z-scores)**



**World Health  
Organization**

| Year: Month | Months | -3 SD | -2 SD | -1 SD | Median | 1 SD | 2 SD | 3 SD |
|-------------|--------|-------|-------|-------|--------|------|------|------|
| 17: 7       | 211    | 15.6  | 17.1  | 19.1  | 21.5   | 24.7 | 29.0 | 35.4 |
| 17: 8       | 212    | 15.6  | 17.2  | 19.1  | 21.5   | 24.7 | 29.1 | 35.4 |
| 17: 9       | 213    | 15.6  | 17.2  | 19.1  | 21.6   | 24.8 | 29.1 | 35.4 |
| 17: 10      | 214    | 15.7  | 17.2  | 19.2  | 21.6   | 24.8 | 29.2 | 35.4 |
| 17: 11      | 215    | 15.7  | 17.3  | 19.2  | 21.7   | 24.9 | 29.2 | 35.4 |
| 18: 0       | 216    | 15.7  | 17.3  | 19.2  | 21.7   | 24.9 | 29.2 | 35.4 |
| 18: 1       | 217    | 15.7  | 17.3  | 19.3  | 21.8   | 25.0 | 29.3 | 35.4 |
| 18: 2       | 218    | 15.7  | 17.3  | 19.3  | 21.8   | 25.0 | 29.3 | 35.5 |
| 18: 3       | 219    | 15.7  | 17.4  | 19.3  | 21.8   | 25.1 | 29.4 | 35.5 |
| 18: 4       | 220    | 15.8  | 17.4  | 19.4  | 21.9   | 25.1 | 29.4 | 35.5 |
| 18: 5       | 221    | 15.8  | 17.4  | 19.4  | 21.9   | 25.1 | 29.5 | 35.5 |
| 18: 6       | 222    | 15.8  | 17.4  | 19.4  | 22.0   | 25.2 | 29.5 | 35.5 |
| 18: 7       | 223    | 15.8  | 17.5  | 19.5  | 22.0   | 25.2 | 29.5 | 35.5 |
| 18: 8       | 224    | 15.8  | 17.5  | 19.5  | 22.0   | 25.3 | 29.6 | 35.5 |
| 18: 9       | 225    | 15.8  | 17.5  | 19.5  | 22.1   | 25.3 | 29.6 | 35.5 |
| 18: 10      | 226    | 15.8  | 17.5  | 19.6  | 22.1   | 25.4 | 29.6 | 35.5 |
| 18: 11      | 227    | 15.8  | 17.5  | 19.6  | 22.2   | 25.4 | 29.7 | 35.5 |
| 19: 0       | 228    | 15.9  | 17.6  | 19.6  | 22.2   | 25.4 | 29.7 | 35.5 |

**2007 WHO Reference**

## Simplified field tables

| Weight-for-height GIRLS<br>2 to 5 years (z-scores) |       |       |       |        |  World Health Organization |      |      |
|----------------------------------------------------|-------|-------|-------|--------|--------------------------------------------------------------------------------------------------------------|------|------|
| cm                                                 | -3 SD | -2 SD | -1 SD | Median | 1 SD                                                                                                         | 2 SD | 3 SD |
| 65.0                                               | 5.6   | 6.1   | 6.6   | 7.2    | 7.9                                                                                                          | 8.7  | 9.7  |
| 65.5                                               | 5.7   | 6.2   | 6.7   | 7.4    | 8.1                                                                                                          | 8.9  | 9.8  |
| 66.0                                               | 5.8   | 6.3   | 6.8   | 7.5    | 8.2                                                                                                          | 9.0  | 10.0 |
| 66.5                                               | 5.8   | 6.4   | 6.9   | 7.6    | 8.3                                                                                                          | 9.1  | 10.1 |
| 67.0                                               | 5.9   | 6.4   | 7.0   | 7.7    | 8.4                                                                                                          | 9.3  | 10.2 |
| 67.5                                               | 6.0   | 6.5   | 7.1   | 7.8    | 8.5                                                                                                          | 9.4  | 10.4 |
| 68.0                                               | 6.1   | 6.6   | 7.2   | 7.9    | 8.7                                                                                                          | 9.5  | 10.5 |
| 68.5                                               | 6.2   | 6.7   | 7.3   | 8.0    | 8.8                                                                                                          | 9.7  | 10.7 |
| 69.0                                               | 6.3   | 6.8   | 7.4   | 8.1    | 8.9                                                                                                          | 9.8  | 10.8 |
| 69.5                                               | 6.3   | 6.9   | 7.5   | 8.2    | 9.0                                                                                                          | 9.9  | 10.9 |
| 70.0                                               | 6.4   | 7.0   | 7.6   | 8.3    | 9.1                                                                                                          | 10.0 | 11.1 |
| 70.5                                               | 6.5   | 7.1   | 7.7   | 8.4    | 9.2                                                                                                          | 10.1 | 11.2 |
| 71.0                                               | 6.6   | 7.1   | 7.8   | 8.5    | 9.3                                                                                                          | 10.3 | 11.3 |
| 71.5                                               | 6.7   | 7.2   | 7.9   | 8.6    | 9.4                                                                                                          | 10.4 | 11.5 |
| 72.0                                               | 6.7   | 7.3   | 8.0   | 8.7    | 9.5                                                                                                          | 10.5 | 11.6 |
| 72.5                                               | 6.8   | 7.4   | 8.1   | 8.8    | 9.7                                                                                                          | 10.6 | 11.7 |
| 73.0                                               | 6.9   | 7.5   | 8.1   | 8.9    | 9.8                                                                                                          | 10.7 | 11.8 |
| 73.5                                               | 7.0   | 7.6   | 8.2   | 9.0    | 9.9                                                                                                          | 10.8 | 12.0 |
| 74.0                                               | 7.0   | 7.6   | 8.3   | 9.1    | 10.0                                                                                                         | 11.0 | 12.1 |
| 74.5                                               | 7.1   | 7.7   | 8.4   | 9.2    | 10.1                                                                                                         | 11.1 | 12.2 |
| 75.0                                               | 7.2   | 7.8   | 8.5   | 9.3    | 10.2                                                                                                         | 11.2 | 12.3 |
| 75.5                                               | 7.2   | 7.9   | 8.6   | 9.4    | 10.3                                                                                                         | 11.3 | 12.5 |
| 76.0                                               | 7.3   | 8.0   | 8.7   | 9.5    | 10.4                                                                                                         | 11.4 | 12.6 |
| 76.5                                               | 7.4   | 8.0   | 8.7   | 9.6    | 10.5                                                                                                         | 11.5 | 12.7 |
| 77.0                                               | 7.5   | 8.1   | 8.8   | 9.6    | 10.6                                                                                                         | 11.6 | 12.8 |
| 77.5                                               | 7.5   | 8.2   | 8.9   | 9.7    | 10.7                                                                                                         | 11.7 | 12.9 |
| 78.0                                               | 7.6   | 8.3   | 9.0   | 9.8    | 10.8                                                                                                         | 11.8 | 13.1 |
| 78.5                                               | 7.7   | 8.4   | 9.1   | 9.9    | 10.9                                                                                                         | 12.0 | 13.2 |
| 79.0                                               | 7.8   | 8.4   | 9.2   | 10.0   | 11.0                                                                                                         | 12.1 | 13.3 |
| 79.5                                               | 7.8   | 8.5   | 9.3   | 10.1   | 11.1                                                                                                         | 12.2 | 13.4 |

**Weight-for-height GIRLS  
2 to 5 years (z-scores)**

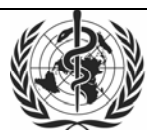

**World Health  
Organization**

| cm   | -3 SD | -2 SD | -1 SD | Median | 1 SD | 2 SD | 3 SD |
|------|-------|-------|-------|--------|------|------|------|
| 80.0 | 7.9   | 8.6   | 9.4   | 10.2   | 11.2 | 12.3 | 13.6 |
| 80.5 | 8.0   | 8.7   | 9.5   | 10.3   | 11.3 | 12.4 | 13.7 |
| 81.0 | 8.1   | 8.8   | 9.6   | 10.4   | 11.4 | 12.6 | 13.9 |
| 81.5 | 8.2   | 8.9   | 9.7   | 10.6   | 11.6 | 12.7 | 14.0 |
| 82.0 | 8.3   | 9.0   | 9.8   | 10.7   | 11.7 | 12.8 | 14.1 |
| 82.5 | 8.4   | 9.1   | 9.9   | 10.8   | 11.8 | 13.0 | 14.3 |
| 83.0 | 8.5   | 9.2   | 10.0  | 10.9   | 11.9 | 13.1 | 14.5 |
| 83.5 | 8.5   | 9.3   | 10.1  | 11.0   | 12.1 | 13.3 | 14.6 |
| 84.0 | 8.6   | 9.4   | 10.2  | 11.1   | 12.2 | 13.4 | 14.8 |
| 84.5 | 8.7   | 9.5   | 10.3  | 11.3   | 12.3 | 13.5 | 14.9 |
| 85.0 | 8.8   | 9.6   | 10.4  | 11.4   | 12.5 | 13.7 | 15.1 |
| 85.5 | 8.9   | 9.7   | 10.6  | 11.5   | 12.6 | 13.8 | 15.3 |
| 86.0 | 9.0   | 9.8   | 10.7  | 11.6   | 12.7 | 14.0 | 15.4 |
| 86.5 | 9.1   | 9.9   | 10.8  | 11.8   | 12.9 | 14.2 | 15.6 |
| 87.0 | 9.2   | 10.0  | 10.9  | 11.9   | 13.0 | 14.3 | 15.8 |
| 87.5 | 9.3   | 10.1  | 11.0  | 12.0   | 13.2 | 14.5 | 15.9 |
| 88.0 | 9.4   | 10.2  | 11.1  | 12.1   | 13.3 | 14.6 | 16.1 |
| 88.5 | 9.5   | 10.3  | 11.2  | 12.3   | 13.4 | 14.8 | 16.3 |
| 89.0 | 9.6   | 10.4  | 11.4  | 12.4   | 13.6 | 14.9 | 16.4 |
| 89.5 | 9.7   | 10.5  | 11.5  | 12.5   | 13.7 | 15.1 | 16.6 |
| 90.0 | 9.8   | 10.6  | 11.6  | 12.6   | 13.8 | 15.2 | 16.8 |
| 90.5 | 9.9   | 10.7  | 11.7  | 12.8   | 14.0 | 15.4 | 16.9 |
| 91.0 | 10.0  | 10.9  | 11.8  | 12.9   | 14.1 | 15.5 | 17.1 |
| 91.5 | 10.1  | 11.0  | 11.9  | 13.0   | 14.3 | 15.7 | 17.3 |
| 92.0 | 10.2  | 11.1  | 12.0  | 13.1   | 14.4 | 15.8 | 17.4 |
| 92.5 | 10.3  | 11.2  | 12.1  | 13.3   | 14.5 | 16.0 | 17.6 |
| 93.0 | 10.4  | 11.3  | 12.3  | 13.4   | 14.7 | 16.1 | 17.8 |
| 93.5 | 10.5  | 11.4  | 12.4  | 13.5   | 14.8 | 16.3 | 17.9 |
| 94.0 | 10.6  | 11.5  | 12.5  | 13.6   | 14.9 | 16.4 | 18.1 |
| 94.5 | 10.7  | 11.6  | 12.6  | 13.8   | 15.1 | 16.6 | 18.3 |
| 95.0 | 10.8  | 11.7  | 12.7  | 13.9   | 15.2 | 16.7 | 18.5 |

# Weight-for-height GIRLS 2 to 5 years (z-scores)



World Health  
Organization

| cm    | -3 SD | -2 SD | -1 SD | Median | 1 SD | 2 SD | 3 SD |
|-------|-------|-------|-------|--------|------|------|------|
| 95.5  | 10.8  | 11.8  | 12.8  | 14.0   | 15.4 | 16.9 | 18.6 |
| 96.0  | 10.9  | 11.9  | 12.9  | 14.1   | 15.5 | 17.0 | 18.8 |
| 96.5  | 11.0  | 12.0  | 13.1  | 14.3   | 15.6 | 17.2 | 19.0 |
| 97.0  | 11.1  | 12.1  | 13.2  | 14.4   | 15.8 | 17.4 | 19.2 |
| 97.5  | 11.2  | 12.2  | 13.3  | 14.5   | 15.9 | 17.5 | 19.3 |
| 98.0  | 11.3  | 12.3  | 13.4  | 14.7   | 16.1 | 17.7 | 19.5 |
| 98.5  | 11.4  | 12.4  | 13.5  | 14.8   | 16.2 | 17.9 | 19.7 |
| 99.0  | 11.5  | 12.5  | 13.7  | 14.9   | 16.4 | 18.0 | 19.9 |
| 99.5  | 11.6  | 12.7  | 13.8  | 15.1   | 16.5 | 18.2 | 20.1 |
| 100.0 | 11.7  | 12.8  | 13.9  | 15.2   | 16.7 | 18.4 | 20.3 |
| 100.5 | 11.9  | 12.9  | 14.1  | 15.4   | 16.9 | 18.6 | 20.5 |
| 101.0 | 12.0  | 13.0  | 14.2  | 15.5   | 17.0 | 18.7 | 20.7 |
| 101.5 | 12.1  | 13.1  | 14.3  | 15.7   | 17.2 | 18.9 | 20.9 |
| 102.0 | 12.2  | 13.3  | 14.5  | 15.8   | 17.4 | 19.1 | 21.1 |
| 102.5 | 12.3  | 13.4  | 14.6  | 16.0   | 17.5 | 19.3 | 21.4 |
| 103.0 | 12.4  | 13.5  | 14.7  | 16.1   | 17.7 | 19.5 | 21.6 |
| 103.5 | 12.5  | 13.6  | 14.9  | 16.3   | 17.9 | 19.7 | 21.8 |
| 104.0 | 12.6  | 13.8  | 15.0  | 16.4   | 18.1 | 19.9 | 22.0 |
| 104.5 | 12.8  | 13.9  | 15.2  | 16.6   | 18.2 | 20.1 | 22.3 |
| 105.0 | 12.9  | 14.0  | 15.3  | 16.8   | 18.4 | 20.3 | 22.5 |
| 105.5 | 13.0  | 14.2  | 15.5  | 16.9   | 18.6 | 20.5 | 22.7 |
| 106.0 | 13.1  | 14.3  | 15.6  | 17.1   | 18.8 | 20.8 | 23.0 |
| 106.5 | 13.3  | 14.5  | 15.8  | 17.3   | 19.0 | 21.0 | 23.2 |
| 107.0 | 13.4  | 14.6  | 15.9  | 17.5   | 19.2 | 21.2 | 23.5 |
| 107.5 | 13.5  | 14.7  | 16.1  | 17.7   | 19.4 | 21.4 | 23.7 |
| 108.0 | 13.7  | 14.9  | 16.3  | 17.8   | 19.6 | 21.7 | 24.0 |
| 108.5 | 13.8  | 15.0  | 16.4  | 18.0   | 19.8 | 21.9 | 24.3 |
| 109.0 | 13.9  | 15.2  | 16.6  | 18.2   | 20.0 | 22.1 | 24.5 |
| 109.5 | 14.1  | 15.4  | 16.8  | 18.4   | 20.3 | 22.4 | 24.8 |
| 110.0 | 14.2  | 15.5  | 17.0  | 18.6   | 20.5 | 22.6 | 25.1 |
| 110.5 | 14.4  | 15.7  | 17.1  | 18.8   | 20.7 | 22.9 | 25.4 |

| Weight-for-height GIRLS<br>2 to 5 years (z-scores) |       |       |       |        |  World Health<br>Organization |      |      |
|----------------------------------------------------|-------|-------|-------|--------|-----------------------------------------------------------------------------------------------------------------|------|------|
| cm                                                 | -3 SD | -2 SD | -1 SD | Median | 1 SD                                                                                                            | 2 SD | 3 SD |
| 111.0                                              | 14.5  | 15.8  | 17.3  | 19.0   | 20.9                                                                                                            | 23.1 | 25.7 |
| 111.5                                              | 14.7  | 16.0  | 17.5  | 19.2   | 21.2                                                                                                            | 23.4 | 26.0 |
| 112.0                                              | 14.8  | 16.2  | 17.7  | 19.4   | 21.4                                                                                                            | 23.6 | 26.2 |
| 112.5                                              | 15.0  | 16.3  | 17.9  | 19.6   | 21.6                                                                                                            | 23.9 | 26.5 |
| 113.0                                              | 15.1  | 16.5  | 18.0  | 19.8   | 21.8                                                                                                            | 24.2 | 26.8 |
| 113.5                                              | 15.3  | 16.7  | 18.2  | 20.0   | 22.1                                                                                                            | 24.4 | 27.1 |
| 114.0                                              | 15.4  | 16.8  | 18.4  | 20.2   | 22.3                                                                                                            | 24.7 | 27.4 |
| 114.5                                              | 15.6  | 17.0  | 18.6  | 20.5   | 22.6                                                                                                            | 25.0 | 27.8 |
| 115.0                                              | 15.7  | 17.2  | 18.8  | 20.7   | 22.8                                                                                                            | 25.2 | 28.1 |
| 115.5                                              | 15.9  | 17.3  | 19.0  | 20.9   | 23.0                                                                                                            | 25.5 | 28.4 |
| 116.0                                              | 16.0  | 17.5  | 19.2  | 21.1   | 23.3                                                                                                            | 25.8 | 28.7 |
| 116.5                                              | 16.2  | 17.7  | 19.4  | 21.3   | 23.5                                                                                                            | 26.1 | 29.0 |
| 117.0                                              | 16.3  | 17.8  | 19.6  | 21.5   | 23.8                                                                                                            | 26.3 | 29.3 |
| 117.5                                              | 16.5  | 18.0  | 19.8  | 21.7   | 24.0                                                                                                            | 26.6 | 29.6 |
| 118.0                                              | 16.6  | 18.2  | 19.9  | 22.0   | 24.2                                                                                                            | 26.9 | 29.9 |
| 118.5                                              | 16.8  | 18.4  | 20.1  | 22.2   | 24.5                                                                                                            | 27.2 | 30.3 |
| 119.0                                              | 16.9  | 18.5  | 20.3  | 22.4   | 24.7                                                                                                            | 27.4 | 30.6 |
| 119.5                                              | 17.1  | 18.7  | 20.5  | 22.6   | 25.0                                                                                                            | 27.7 | 30.9 |
| 120.0                                              | 17.3  | 18.9  | 20.7  | 22.8   | 25.2                                                                                                            | 28.0 | 31.2 |
| WHO Child Growth Standards                         |       |       |       |        |                                                                                                                 |      |      |

## WHO Child Growth Standards



## Simplified field tables

| Weight-for-height BOYS<br>2 to 5 years (z-scores) |       |       |       |  World Health Organization |      |      |      |
|---------------------------------------------------|-------|-------|-------|--------------------------------------------------------------------------------------------------------------|------|------|------|
| cm                                                | -3 SD | -2 SD | -1 SD | Median                                                                                                       | 1 SD | 2 SD | 3 SD |
| 65.0                                              | 5.9   | 6.3   | 6.9   | 7.4                                                                                                          | 8.1  | 8.8  | 9.6  |
| 65.5                                              | 6.0   | 6.4   | 7.0   | 7.6                                                                                                          | 8.2  | 8.9  | 9.8  |
| 66.0                                              | 6.1   | 6.5   | 7.1   | 7.7                                                                                                          | 8.3  | 9.1  | 9.9  |
| 66.5                                              | 6.1   | 6.6   | 7.2   | 7.8                                                                                                          | 8.5  | 9.2  | 10.1 |
| 67.0                                              | 6.2   | 6.7   | 7.3   | 7.9                                                                                                          | 8.6  | 9.4  | 10.2 |
| 67.5                                              | 6.3   | 6.8   | 7.4   | 8.0                                                                                                          | 8.7  | 9.5  | 10.4 |
| 68.0                                              | 6.4   | 6.9   | 7.5   | 8.1                                                                                                          | 8.8  | 9.6  | 10.5 |
| 68.5                                              | 6.5   | 7.0   | 7.6   | 8.2                                                                                                          | 9.0  | 9.8  | 10.7 |
| 69.0                                              | 6.6   | 7.1   | 7.7   | 8.4                                                                                                          | 9.1  | 9.9  | 10.8 |
| 69.5                                              | 6.7   | 7.2   | 7.8   | 8.5                                                                                                          | 9.2  | 10.0 | 11.0 |
| 70.0                                              | 6.8   | 7.3   | 7.9   | 8.6                                                                                                          | 9.3  | 10.2 | 11.1 |
| 70.5                                              | 6.9   | 7.4   | 8.0   | 8.7                                                                                                          | 9.5  | 10.3 | 11.3 |
| 71.0                                              | 6.9   | 7.5   | 8.1   | 8.8                                                                                                          | 9.6  | 10.4 | 11.4 |
| 71.5                                              | 7.0   | 7.6   | 8.2   | 8.9                                                                                                          | 9.7  | 10.6 | 11.6 |
| 72.0                                              | 7.1   | 7.7   | 8.3   | 9.0                                                                                                          | 9.8  | 10.7 | 11.7 |
| 72.5                                              | 7.2   | 7.8   | 8.4   | 9.1                                                                                                          | 9.9  | 10.8 | 11.8 |
| 73.0                                              | 7.3   | 7.9   | 8.5   | 9.2                                                                                                          | 10.0 | 11.0 | 12.0 |
| 73.5                                              | 7.4   | 7.9   | 8.6   | 9.3                                                                                                          | 10.2 | 11.1 | 12.1 |
| 74.0                                              | 7.4   | 8.0   | 8.7   | 9.4                                                                                                          | 10.3 | 11.2 | 12.2 |
| 74.5                                              | 7.5   | 8.1   | 8.8   | 9.5                                                                                                          | 10.4 | 11.3 | 12.4 |
| 75.0                                              | 7.6   | 8.2   | 8.9   | 9.6                                                                                                          | 10.5 | 11.4 | 12.5 |
| 75.5                                              | 7.7   | 8.3   | 9.0   | 9.7                                                                                                          | 10.6 | 11.6 | 12.6 |
| 76.0                                              | 7.7   | 8.4   | 9.1   | 9.8                                                                                                          | 10.7 | 11.7 | 12.8 |
| 76.5                                              | 7.8   | 8.5   | 9.2   | 9.9                                                                                                          | 10.8 | 11.8 | 12.9 |
| 77.0                                              | 7.9   | 8.5   | 9.2   | 10.0                                                                                                         | 10.9 | 11.9 | 13.0 |
| 77.5                                              | 8.0   | 8.6   | 9.3   | 10.1                                                                                                         | 11.0 | 12.0 | 13.1 |
| 78.0                                              | 8.0   | 8.7   | 9.4   | 10.2                                                                                                         | 11.1 | 12.1 | 13.3 |
| 78.5                                              | 8.1   | 8.8   | 9.5   | 10.3                                                                                                         | 11.2 | 12.2 | 13.4 |
| 79.0                                              | 8.2   | 8.8   | 9.6   | 10.4                                                                                                         | 11.3 | 12.3 | 13.5 |
| 79.5                                              | 8.3   | 8.9   | 9.7   | 10.5                                                                                                         | 11.4 | 12.4 | 13.6 |

# Weight-for-height BOYS 2 to 5 years (z-scores)



World Health  
Organization

| cm   | -3 SD | -2 SD | -1 SD | Median | 1 SD | 2 SD | 3 SD |
|------|-------|-------|-------|--------|------|------|------|
| 80.0 | 8.3   | 9.0   | 9.7   | 10.6   | 11.5 | 12.6 | 13.7 |
| 80.5 | 8.4   | 9.1   | 9.8   | 10.7   | 11.6 | 12.7 | 13.8 |
| 81.0 | 8.5   | 9.2   | 9.9   | 10.8   | 11.7 | 12.8 | 14.0 |
| 81.5 | 8.6   | 9.3   | 10.0  | 10.9   | 11.8 | 12.9 | 14.1 |
| 82.0 | 8.7   | 9.3   | 10.1  | 11.0   | 11.9 | 13.0 | 14.2 |
| 82.5 | 8.7   | 9.4   | 10.2  | 11.1   | 12.1 | 13.1 | 14.4 |
| 83.0 | 8.8   | 9.5   | 10.3  | 11.2   | 12.2 | 13.3 | 14.5 |
| 83.5 | 8.9   | 9.6   | 10.4  | 11.3   | 12.3 | 13.4 | 14.6 |
| 84.0 | 9.0   | 9.7   | 10.5  | 11.4   | 12.4 | 13.5 | 14.8 |
| 84.5 | 9.1   | 9.9   | 10.7  | 11.5   | 12.5 | 13.7 | 14.9 |
| 85.0 | 9.2   | 10.0  | 10.8  | 11.7   | 12.7 | 13.8 | 15.1 |
| 85.5 | 9.3   | 10.1  | 10.9  | 11.8   | 12.8 | 13.9 | 15.2 |
| 86.0 | 9.4   | 10.2  | 11.0  | 11.9   | 12.9 | 14.1 | 15.4 |
| 86.5 | 9.5   | 10.3  | 11.1  | 12.0   | 13.1 | 14.2 | 15.5 |
| 87.0 | 9.6   | 10.4  | 11.2  | 12.2   | 13.2 | 14.4 | 15.7 |
| 87.5 | 9.7   | 10.5  | 11.3  | 12.3   | 13.3 | 14.5 | 15.8 |
| 88.0 | 9.8   | 10.6  | 11.5  | 12.4   | 13.5 | 14.7 | 16.0 |
| 88.5 | 9.9   | 10.7  | 11.6  | 12.5   | 13.6 | 14.8 | 16.1 |
| 89.0 | 10.0  | 10.8  | 11.7  | 12.6   | 13.7 | 14.9 | 16.3 |
| 89.5 | 10.1  | 10.9  | 11.8  | 12.8   | 13.9 | 15.1 | 16.4 |
| 90.0 | 10.2  | 11.0  | 11.9  | 12.9   | 14.0 | 15.2 | 16.6 |
| 90.5 | 10.3  | 11.1  | 12.0  | 13.0   | 14.1 | 15.3 | 16.7 |
| 91.0 | 10.4  | 11.2  | 12.1  | 13.1   | 14.2 | 15.5 | 16.9 |
| 91.5 | 10.5  | 11.3  | 12.2  | 13.2   | 14.4 | 15.6 | 17.0 |
| 92.0 | 10.6  | 11.4  | 12.3  | 13.4   | 14.5 | 15.8 | 17.2 |
| 92.5 | 10.7  | 11.5  | 12.4  | 13.5   | 14.6 | 15.9 | 17.3 |
| 93.0 | 10.8  | 11.6  | 12.6  | 13.6   | 14.7 | 16.0 | 17.5 |
| 93.5 | 10.9  | 11.7  | 12.7  | 13.7   | 14.9 | 16.2 | 17.6 |
| 94.0 | 11.0  | 11.8  | 12.8  | 13.8   | 15.0 | 16.3 | 17.8 |
| 94.5 | 11.1  | 11.9  | 12.9  | 13.9   | 15.1 | 16.5 | 17.9 |
| 95.0 | 11.1  | 12.0  | 13.0  | 14.1   | 15.3 | 16.6 | 18.1 |

# Weight-for-height BOYS 2 to 5 years (z-scores)



World Health  
Organization

| cm    | -3 SD | -2 SD | -1 SD | Median | 1 SD | 2 SD | 3 SD |
|-------|-------|-------|-------|--------|------|------|------|
| 95.5  | 11.2  | 12.1  | 13.1  | 14.2   | 15.4 | 16.7 | 18.3 |
| 96.0  | 11.3  | 12.2  | 13.2  | 14.3   | 15.5 | 16.9 | 18.4 |
| 96.5  | 11.4  | 12.3  | 13.3  | 14.4   | 15.7 | 17.0 | 18.6 |
| 97.0  | 11.5  | 12.4  | 13.4  | 14.6   | 15.8 | 17.2 | 18.8 |
| 97.5  | 11.6  | 12.5  | 13.6  | 14.7   | 15.9 | 17.4 | 18.9 |
| 98.0  | 11.7  | 12.6  | 13.7  | 14.8   | 16.1 | 17.5 | 19.1 |
| 98.5  | 11.8  | 12.8  | 13.8  | 14.9   | 16.2 | 17.7 | 19.3 |
| 99.0  | 11.9  | 12.9  | 13.9  | 15.1   | 16.4 | 17.9 | 19.5 |
| 99.5  | 12.0  | 13.0  | 14.0  | 15.2   | 16.5 | 18.0 | 19.7 |
| 100.0 | 12.1  | 13.1  | 14.2  | 15.4   | 16.7 | 18.2 | 19.9 |
| 100.5 | 12.2  | 13.2  | 14.3  | 15.5   | 16.9 | 18.4 | 20.1 |
| 101.0 | 12.3  | 13.3  | 14.4  | 15.6   | 17.0 | 18.5 | 20.3 |
| 101.5 | 12.4  | 13.4  | 14.5  | 15.8   | 17.2 | 18.7 | 20.5 |
| 102.0 | 12.5  | 13.6  | 14.7  | 15.9   | 17.3 | 18.9 | 20.7 |
| 102.5 | 12.6  | 13.7  | 14.8  | 16.1   | 17.5 | 19.1 | 20.9 |
| 103.0 | 12.8  | 13.8  | 14.9  | 16.2   | 17.7 | 19.3 | 21.1 |
| 103.5 | 12.9  | 13.9  | 15.1  | 16.4   | 17.8 | 19.5 | 21.3 |
| 104.0 | 13.0  | 14.0  | 15.2  | 16.5   | 18.0 | 19.7 | 21.6 |
| 104.5 | 13.1  | 14.2  | 15.4  | 16.7   | 18.2 | 19.9 | 21.8 |
| 105.0 | 13.2  | 14.3  | 15.5  | 16.8   | 18.4 | 20.1 | 22.0 |
| 105.5 | 13.3  | 14.4  | 15.6  | 17.0   | 18.5 | 20.3 | 22.2 |
| 106.0 | 13.4  | 14.5  | 15.8  | 17.2   | 18.7 | 20.5 | 22.5 |
| 106.5 | 13.5  | 14.7  | 15.9  | 17.3   | 18.9 | 20.7 | 22.7 |
| 107.0 | 13.7  | 14.8  | 16.1  | 17.5   | 19.1 | 20.9 | 22.9 |
| 107.5 | 13.8  | 14.9  | 16.2  | 17.7   | 19.3 | 21.1 | 23.2 |
| 108.0 | 13.9  | 15.1  | 16.4  | 17.8   | 19.5 | 21.3 | 23.4 |
| 108.5 | 14.0  | 15.2  | 16.5  | 18.0   | 19.7 | 21.5 | 23.7 |
| 109.0 | 14.1  | 15.3  | 16.7  | 18.2   | 19.8 | 21.8 | 23.9 |
| 109.5 | 14.3  | 15.5  | 16.8  | 18.3   | 20.0 | 22.0 | 24.2 |
| 110.0 | 14.4  | 15.6  | 17.0  | 18.5   | 20.2 | 22.2 | 24.4 |
| 110.5 | 14.5  | 15.8  | 17.1  | 18.7   | 20.4 | 22.4 | 24.7 |

| Weight-for-height BOYS<br>2 to 5 years (z-scores) |       |       |       |        |  World Health Organization |      |      |
|---------------------------------------------------|-------|-------|-------|--------|--------------------------------------------------------------------------------------------------------------|------|------|
| cm                                                | -3 SD | -2 SD | -1 SD | Median | 1 SD                                                                                                         | 2 SD | 3 SD |
| 111.0                                             | 14.6  | 15.9  | 17.3  | 18.9   | 20.7                                                                                                         | 22.7 | 25.0 |
| 111.5                                             | 14.8  | 16.0  | 17.5  | 19.1   | 20.9                                                                                                         | 22.9 | 25.2 |
| 112.0                                             | 14.9  | 16.2  | 17.6  | 19.2   | 21.1                                                                                                         | 23.1 | 25.5 |
| 112.5                                             | 15.0  | 16.3  | 17.8  | 19.4   | 21.3                                                                                                         | 23.4 | 25.8 |
| 113.0                                             | 15.2  | 16.5  | 18.0  | 19.6   | 21.5                                                                                                         | 23.6 | 26.0 |
| 113.5                                             | 15.3  | 16.6  | 18.1  | 19.8   | 21.7                                                                                                         | 23.9 | 26.3 |
| 114.0                                             | 15.4  | 16.8  | 18.3  | 20.0   | 21.9                                                                                                         | 24.1 | 26.6 |
| 114.5                                             | 15.6  | 16.9  | 18.5  | 20.2   | 22.1                                                                                                         | 24.4 | 26.9 |
| 115.0                                             | 15.7  | 17.1  | 18.6  | 20.4   | 22.4                                                                                                         | 24.6 | 27.2 |
| 115.5                                             | 15.8  | 17.2  | 18.8  | 20.6   | 22.6                                                                                                         | 24.9 | 27.5 |
| 116.0                                             | 16.0  | 17.4  | 19.0  | 20.8   | 22.8                                                                                                         | 25.1 | 27.8 |
| 116.5                                             | 16.1  | 17.5  | 19.2  | 21.0   | 23.0                                                                                                         | 25.4 | 28.0 |
| 117.0                                             | 16.2  | 17.7  | 19.3  | 21.2   | 23.3                                                                                                         | 25.6 | 28.3 |
| 117.5                                             | 16.4  | 17.9  | 19.5  | 21.4   | 23.5                                                                                                         | 25.9 | 28.6 |
| 118.0                                             | 16.5  | 18.0  | 19.7  | 21.6   | 23.7                                                                                                         | 26.1 | 28.9 |
| 118.5                                             | 16.7  | 18.2  | 19.9  | 21.8   | 23.9                                                                                                         | 26.4 | 29.2 |
| 119.0                                             | 16.8  | 18.3  | 20.0  | 22.0   | 24.1                                                                                                         | 26.6 | 29.5 |
| 119.5                                             | 16.9  | 18.5  | 20.2  | 22.2   | 24.4                                                                                                         | 26.9 | 29.8 |
| 120.0                                             | 17.1  | 18.6  | 20.4  | 22.4   | 24.6                                                                                                         | 27.2 | 30.1 |
| WHO Child Growth Standards                        |       |       |       |        |                                                                                                              |      |      |

## WHO Child Growth Standards
